# Supplementary material for: Expanded tumor-associated polymorphonuclear myeloid-derived suppressor cells in Waldenstrom macroglobulinemia display immune suppressive activity
Source: PubMed Central journal article supplement — Blood Cancer J. 2024 Dec 18;14(1):217. doi: 10.1038/s41408-024-01173-w (PMC11655835; doi:10.1038/s41408-024-01173-w), 2024-12-18
Supplement: 41408_2024_1173_MOESM1_ESM.pdf [file 41408_2024_1173_MOESM1_ESM.pdf]

## Supplementary Figure 1

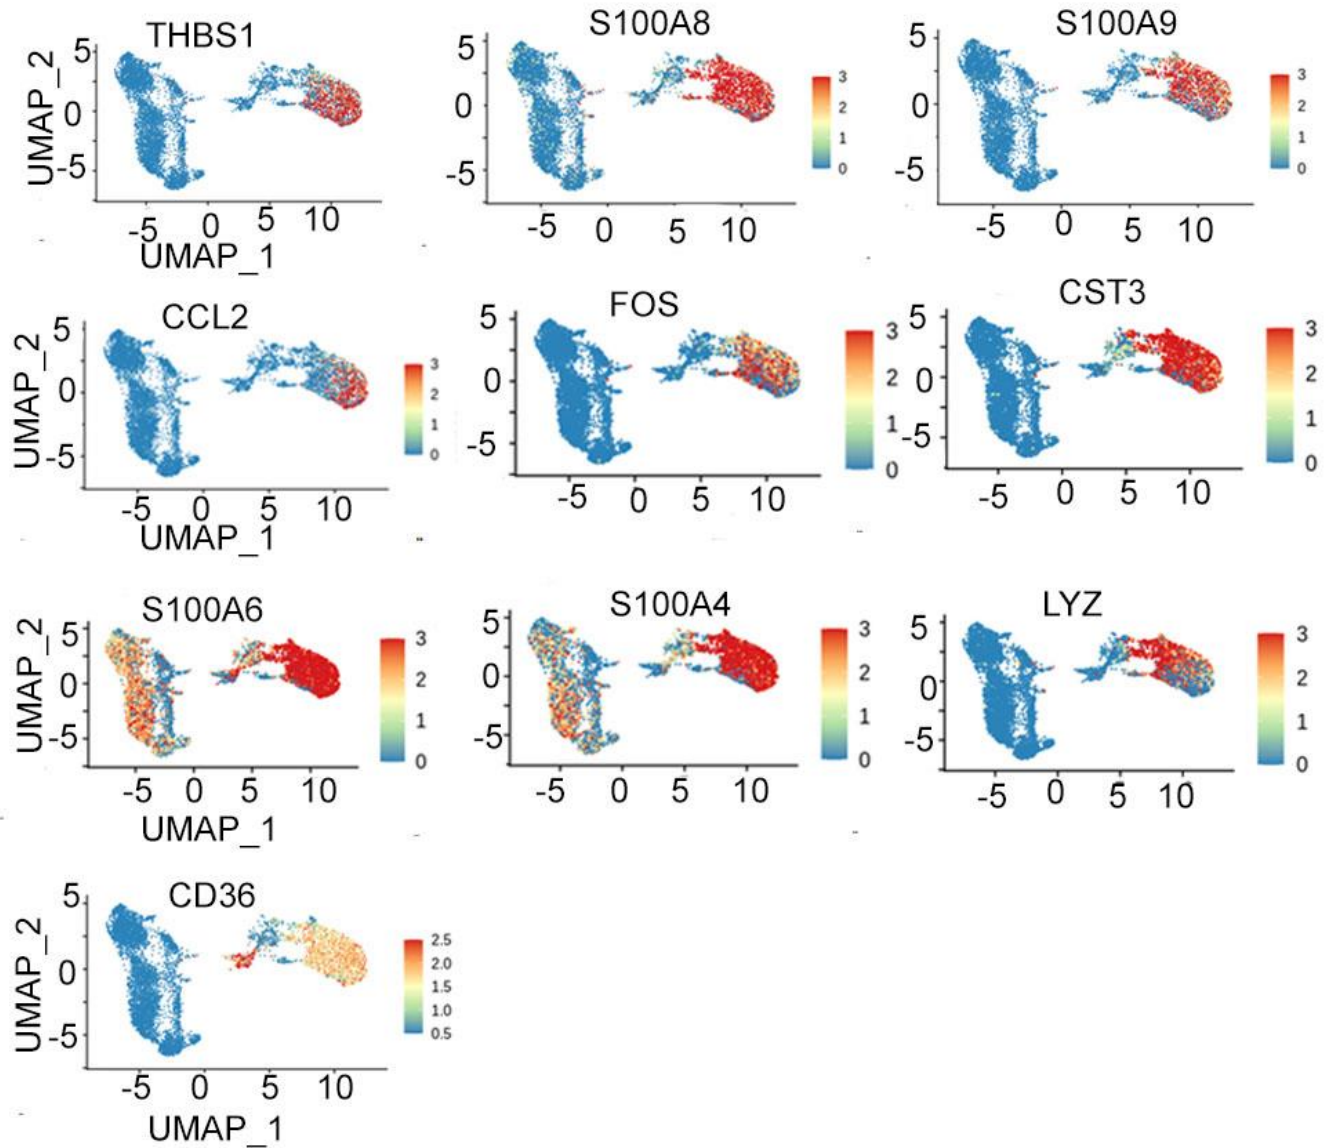

**Supplementary Figure 1:** Gene expression on WM MDSCs: UMAP plots for selected genes expressed on MDSCs : THBS1, S100A8, S100A9, CCL2, FOS, CST3, S100A6, S100A4, LYZ, and CD36. In each featured plot, we color each cell according to the intensity of the relative expression on genes.

## Supplementary Figure 2

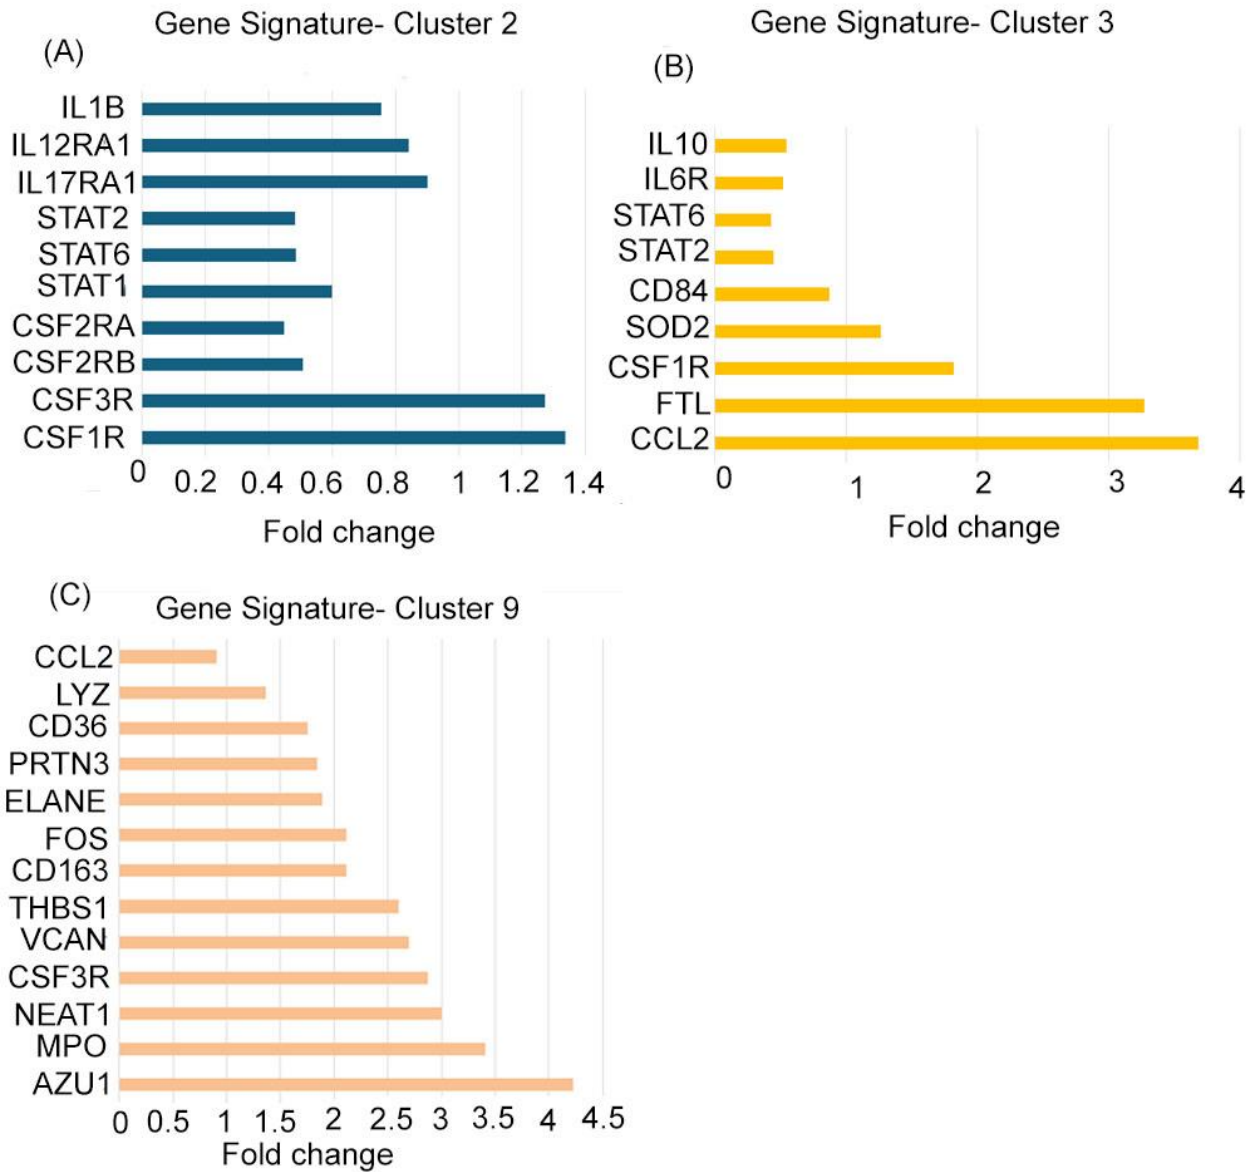

**Supplementary Figure 2:** The distinct transcriptome gene expression of MDSCs clusters: (A) Bar chart depicting signature gene expression of cluster 2. (B) Bar chart illustrating the expression of signature genes in Cluster 3. (C) Bar chart showing the expression of hallmark genes in Cluster 9.

**Supplementary Table 1:** Patient characteristics

|                                 |          |
|---------------------------------|----------|
| Clinical parameters             | N =24    |
| Median age (range) (years)      | 53-79    |
| Median BM involvement (range) % | 10-90    |
| Median serum IgM (range) mg/dl  | 402-6060 |
| HGB<11.5g/dL                    |          |
| Yes                             | 12       |
| No                              | 12       |
| Platelet<100*10 <sup>9</sup> /L |          |
| Yes                             | 3        |
| No                              | 21       |
| Beta-2-Microglobulin>3mcg/ml    |          |
| Yes                             | 11       |
| No                              | 4        |
| No data                         | 9        |
| Disease status                  |          |
| SWM                             | 7        |
| Symptomatic                     | 17       |
| ISSWM                           |          |
| 1                               | 2        |
| 2                               | 15       |
| 3                               | 7        |
| First line treatment            |          |
| Observation                     | 13       |
| Chemoimmunotherapy              | 11       |

Note: BM: Bone marrow, HGB: Hemoglobin, ISSWM: International Prognostic Scoring System for WM.

**Supplementary Table 2: CyTOF and CITEseq antibodies**

CyTOF antibodies

CITEseq antibodies

**Table 2.1:** List of Cytof antibodies

| Channel | Target         | Clone    | Location | Source   |
|---------|----------------|----------|----------|----------|
| 89Y     | CD45           | HI30     | Surface  | Fluidigm |
| 140Ce   | EQ beads       | n/a      | n/a      | Fluidigm |
| 142Nd   | CD19           | HIB19    | Surface  | Fluidigm |
| 143Nd   | CD127 (IL-7Ra) | A019D5   | Surface  | Fluidigm |
| 144Nd   | CD15 (SSEA-1)  | W6D3     | surface  | Fluidigm |
| 145Nd   | CD163          | GHI/61   | surface  | Fluidigm |
| 147Sm   | CD11c          | Bu15     | Surface  | Fluidigm |
| 148Nd   | CD16           | 3G8      | Surface  | Fluidigm |
| 150Nd   | CD138          | DL-101   | surface  | Fluidigm |
| 151Eu   | CD123/IL-3R    | 6H6      | Surface  | Fluidigm |
| 152Sm   | CD36           |          | Surface  |          |
| 154Sm   | CD3            | UCHT1    | Surface  | Fluidigm |
| 155Gd   | CD45RA         | HI100    | Surface  | Fluidigm |
| 156Gd   | PD-L1          | 29E.2A3  | Surface  | Fluidigm |
| 158Gd   | CD33           | WM53     | surface  | Fluidigm |
| 162Dy   | CD66b          | 80H3     | Surface  | Fluidigm |
| 165Ho   | CD45RO         | UCHL1    | Surface  | Fluidigm |
| 167Er   | CD197 (CCR7)   | G043H7   | Surface  | Fluidigm |
| 168Er   | CD8a           | SK1      | Surface  | Fluidigm |
| 169Tm   | CD25/IL-2R     | 2A3      | Surface  | Fluidigm |
| 173Yb   | HLA-DR         | L243     | Surface  | Fluidigm |
| 174Yb   | CD4            | SK3      | Surface  | Fluidigm |
| 175Lu   | CD14           | M5E2     | Surface  | Fluidigm |
| 176Yb   | CD56/NCAM      | NCAM16.2 | Surface  | Fluidigm |
| 191Ir   | DNA            | n/a      | Nuclear  | Fluidigm |
| 193Ir   | DNA            | n/a      | Nuclear  | Fluidigm |
| 195Pt   | Viability      | n/a      | n/a      | Fluidigm |
| 209Bi   | CD11b (Mac-1)  | ICRF44   | surface  | Fluidigm |

**Table 2.2:** List of CITE Seq antibodies

| Category    | Barcode | Specificity          | Clone   | Reactivity | Barcode Sequence |
|-------------|---------|----------------------|---------|------------|------------------|
| TotalSeq™-C | 0007    | CD274 (B7-H1, PD-L1) | 29E.2A3 | Human      | GTTGTCCGACAATAC  |
| TotalSeq™-C | 0034    | CD3                  | UCHT1   | Human      | CTCATTGTAACCTCT  |
| TotalSeq™-C | 0045    | CD4                  | SK3     | Human      | GAGGTTAGTGATGGA  |
| TotalSeq™-C | 0047    | CD56 (NCAM)          | 5.1H11  | Human      | TCCTTTCCTGATAGG  |
| TotalSeq™-C | 0048    | CD45                 | 2D1     | Human      | TCCCTTGCGATTTAC  |
| TotalSeq™-C | 0050    | CD19                 | HIB19   | Human      | CTGGGCAATTACTCG  |
| TotalSeq™-C | 0051    | CD14                 | 63D3    | Human      | CAATCAGACCTATGA  |
| TotalSeq™-C | 0052    | CD33                 | P67.6   | Human      | TAACTCAGGGCCTAT  |
| TotalSeq™-C | 0053    | CD11c                | S-HCL-3 | Human      | TACGCCTATAACTTG  |
| TotalSeq™-C | 0055    | CD138 (Syndecan-1)   | MI15    | Human      | ACTCTTTCGTTTACG  |
| TotalSeq™-C | 0063    | CD45RA               | HI100   | Human      | TCAATCCTTCCGCTT  |
| TotalSeq™-C | 0064    | CD123                | 6H6     | Human      | CTTCACTCTGTCAGG  |
| TotalSeq™-C | 0080    | CD8a                 | RPA-T8  | Human      | GCTGCGCTTTCCATT  |
| TotalSeq™-C | 0083    | CD16                 | 3G8     | Human      | AAGTTCACCTTTTGC  |
| TotalSeq™-C | 0085    | CD25                 | BC96    | Human      | TTTGTCTGTACGCC   |
| TotalSeq™-C | 0087    | CD45RO               | UCHL1   | Human      | CTCCGAATCATGTTG  |
| TotalSeq™-C | 0148    | CD197 (CCR7)         | G043H7  | Human      | AGTTCAGTCAACCGA  |
| TotalSeq™-C | 0159    | HLA-DR               | L243    | Human      | AATAGCGAGCAAGTA  |
| TotalSeq™-C | 0161    | CD11b                | ICRF44  | Human      | GACAAGTGATCTGCA  |

|             |      |                         |        |       |                 |
|-------------|------|-------------------------|--------|-------|-----------------|
| TotalSeq™-C | 0166 | CD66b                   | 6/40c  | Human | AGCTGTAAGTTTCGG |
| TotalSeq™-C | 0390 | CD127 (IL-7R $\alpha$ ) | A019D5 | Human | GTGTGTTGTCCTATG |
| TotalSeq™-C | 0392 | CD15 (SSEA-1)           | W6D3   | Human | TCACCAGTACCTAGT |
| TotalSeq™-C | 0407 | CD36                    | 5-271  | Human | TTCTTGCCTTGCCA  |
| TotalSeq™-C | 358  | CD163                   | GHI/61 | Human | GCTTCTCCTTCCTTA |

**Supplementary Table 3:** Up and downregulated genes

Table 3.1: Up regulated genes in MDSCs WM vs NBM

Table 3.2: Down regulated genes in MDSCs WM vs NBM

Table 3.3: Up regulated genes in CD66b<sup>+</sup> PMN-MDSCs (PMN vs M-MDSCs)

Table 3.4: Down regulated genes in CD66b<sup>+</sup> MDSCs (PMN vs M-MDSCs)



**Table 3.1:** Up regulated genes in MDSCs WM vs NBM

| Gene     | Ensembl ID      | p_val_adj | avg_log2FC |
|----------|-----------------|-----------|------------|
| THBS1    | ENSG00000137801 | 2.44E-41  | 2.070413   |
| MTRNR2L2 | ENSG00000269028 | 6.63E-62  | 1.758034   |
| HLA-DRB5 | ENSG00000198502 | 2.51E-11  | 1.518066   |
| EGR1     | ENSG00000120738 | 2.7E-15   | 1.429899   |
| ZFP36L1  | ENSG00000185650 | 5.66E-38  | 1.422987   |
| MTRNR2L1 | ENSG00000256618 | 7.52E-06  | 1.371534   |
| MS4A7    | ENSG00000166927 | 1.82E-23  | 1.290619   |
| FOS      | ENSG00000170345 | 3.45E-29  | 1.264835   |
| NRG1     | ENSG00000157168 | 7.78E-14  | 1.203748   |
| ARL4C    | ENSG00000188042 | 1.45E-08  | 1.192812   |
| TIMP1    | ENSG00000102265 | 2.19E-15  | 1.179749   |
| RNASE1   | ENSG00000129538 | 3.15E-13  | 1.149242   |
| RNASE6   | ENSG00000169413 | 3.28E-15  | 1.116015   |
| PAX8-AS1 | ENSG00000189223 | 9.97E-11  | 1.100039   |
| FCGR3A   | ENSG00000203747 | 1.43E-14  | 1.095064   |
| STAB1    | ENSG00000010327 | 1.16E-17  | 1.08326    |
| HIF1A    | ENSG00000100644 | 4.39E-16  | 1.080104   |
| FCGR2A   | ENSG00000143226 | 3.8E-11   | 1.021257   |
| NCF4     | ENSG00000100365 | 1.57E-15  | 1.020558   |
| HLA-DPA1 | ENSG00000231389 | 0.000615  | 0.994244   |
| HSPA6    | ENSG00000173110 | 5.46E-10  | 0.963766   |
| RCBTB2   | ENSG00000136161 | 4.92E-09  | 0.947087   |
| FCGR2B   | ENSG00000072694 | 2.44E-09  | 0.946809   |
| IER2     | ENSG00000160888 | 1.28E-09  | 0.937936   |
| MEF2C    | ENSG00000081189 | 6.37E-11  | 0.927845   |
| JUNB     | ENSG00000171223 | 6.9E-13   | 0.916054   |
| JAML     | ENSG00000160593 | 0.017845  | 0.911375   |
| PLEKHO1  | ENSG00000023902 | 2.01E-10  | 0.90804    |
| DUSP6    | ENSG00000139318 | 1.44E-10  | 0.906785   |
| HLA-DQB1 | ENSG00000179344 | 0.022915  | 0.872323   |
| SLC43A2  | ENSG00000167703 | 3.53E-09  | 0.871021   |
| CD4      | ENSG00000010610 | 3.35E-06  | 0.837785   |
| IER3     | ENSG00000137331 | 4.79E-11  | 0.813778   |
| NISCH    | ENSG00000010322 | 2.01E-05  | 0.812007   |
| TXNIP    | ENSG00000265972 | 2.38E-07  | 0.80962    |
| LPAR6    | ENSG00000139679 | 1.51E-08  | 0.805351   |
| HLA-DRA  | ENSG00000204287 | 0.001648  | 0.803509   |
| ZFP36L2  | ENSG00000152518 | 3.42E-07  | 0.794975   |
| GAS7     | ENSG00000007237 | 6.31E-07  | 0.775393   |
| BTG2     | ENSG00000159388 | 0.001097  | 0.761815   |
| IL10RA   | ENSG00000110324 | 1.54E-07  | 0.760139   |

---

|          |                 |          |          |
|----------|-----------------|----------|----------|
| PILRA    | ENSG00000085514 | 1.73E-05 | 0.756964 |
| PNRC1    | ENSG00000146278 | 0.002192 | 0.750591 |
| QKI      | ENSG00000112531 | 9.58E-05 | 0.746959 |
| BTG1     | ENSG00000133639 | 0.023014 | 0.732978 |
| FXYD5    | ENSG00000089327 | 4.73E-08 | 0.732215 |
| RESF1    | ENSG00000174718 | 1E-05    | 0.716051 |
| AHR      | ENSG00000106546 | 0.004559 | 0.715739 |
| CD86     | ENSG00000114013 | 3.87E-05 | 0.711663 |
| CARD16   | ENSG00000204397 | 0.000296 | 0.705678 |
| FGL2     | ENSG00000127951 | 0.000286 | 0.704753 |
| NFXL1    | ENSG00000170448 | 0.006788 | 0.704209 |
| TGFBR2   | ENSG00000163513 | 0.000524 | 0.696543 |
| IL13RA1  | ENSG00000131724 | 0.004992 | 0.695449 |
| HLA-DQA1 | ENSG00000237541 | 0.031366 | 0.691958 |
| DMXL2    | ENSG00000104093 | 1.24E-05 | 0.684481 |
| MAF      | ENSG00000178573 | 0.000736 | 0.681371 |
| FUCA1    | ENSG00000179163 | 0.003533 | 0.675943 |
| LILRB1   | ENSG00000104972 | 3.25E-06 | 0.671413 |
| TNFRSF1B | ENSG00000028137 | 5.65E-07 | 0.651764 |
| ANPEP    | ENSG00000166825 | 7.05E-06 | 0.650821 |
| TGFBI    | ENSG00000120708 | 8.26E-06 | 0.650457 |
| HLA-E    | ENSG00000204592 | 3.13E-08 | 0.649757 |
| HCLS1    | ENSG00000180353 | 4.46E-06 | 0.649282 |
| TYROBP   | ENSG00000011600 | 1.12E-23 | 0.649095 |
| PNISR    | ENSG00000132424 | 0.010916 | 0.647236 |
| HLA-A    | ENSG00000206503 | 2.42E-10 | 0.643003 |
| ARHGAP4  | ENSG00000089820 | 0.008207 | 0.642683 |
| HBEGF    | ENSG00000113070 | 0.000162 | 0.63757  |
| MPEG1    | ENSG00000197629 | 3.92E-05 | 0.633598 |
| SRRM2    | ENSG00000167978 | 0.028674 | 0.61709  |
| ABTB1    | ENSG00000114626 | 0.023279 | 0.617083 |
| NCKAP1L  | ENSG00000123338 | 0.035938 | 0.612711 |
| MS4A14   | ENSG00000166928 | 1.49E-06 | 0.612674 |
| LILRB2   | ENSG00000131042 | 0.000636 | 0.608169 |
| SPI1     | ENSG00000066336 | 6.2E-05  | 0.602771 |
| GPR82    | ENSG00000171657 | 0.000698 | 0.599254 |
| HLA-F    | ENSG00000204642 | 0.004372 | 0.599184 |
| CD74     | ENSG00000019582 | 0.000195 | 0.596783 |
| CTTNBP2  | ENSG00000077063 | 0.00052  | 0.590533 |
| VSIR     | ENSG00000107738 | 0.00113  | 0.587654 |
| ITM2B    | ENSG00000136156 | 2.66E-06 | 0.586135 |
| MAP3K3   | ENSG00000198909 | 0.023565 | 0.575057 |
| FPR3     | ENSG00000187474 | 0.003609 | 0.570843 |
| OLFML2B  | ENSG00000162745 | 0.000844 | 0.561462 |

---

---

|          |                 |          |          |
|----------|-----------------|----------|----------|
| CSF1R    | ENSG00000182578 | 0.000881 | 0.560716 |
| HS3ST1   | ENSG00000002587 | 0.001622 | 0.55624  |
| FCN1     | ENSG00000085265 | 6.01E-10 | 0.545899 |
| TNNT1    | ENSG00000105048 | 0.01022  | 0.54067  |
| CYBA     | ENSG00000051523 | 0.011155 | 0.535785 |
| GPRIN3   | ENSG00000185477 | 0.003135 | 0.515497 |
| TCIRG1   | ENSG00000110719 | 0.000204 | 0.515483 |
| C1orf162 | ENSG00000143110 | 0.032404 | 0.508093 |
| GAPT     | ENSG00000175857 | 0.003239 | 0.506559 |
| COTL1    | ENSG00000103187 | 0.000463 | 0.481456 |
| MALAT1   | ENSG00000251562 | 6.92E-11 | 0.471916 |
| SLC7A8   | ENSG00000092068 | 0.009185 | 0.470715 |
| SAMHD1   | ENSG00000101347 | 0.000415 | 0.460829 |
| MARCKS   | ENSG00000277443 | 0.011491 | 0.457077 |
| TPT1     | ENSG00000133112 | 1.85E-09 | 0.457007 |
| GNAI2    | ENSG00000114353 | 0.001012 | 0.456569 |
| DDX5     | ENSG00000108654 | 0.009117 | 0.455627 |
| B2M      | ENSG00000166710 | 9.41E-13 | 0.452174 |
| HLA-B    | ENSG00000234745 | 2.99E-08 | 0.436569 |
| CALM2    | ENSG00000143933 | 0.044094 | 0.432342 |
| AIF1     | ENSG00000204472 | 3.03E-07 | 0.431836 |
| FYB1     | ENSG00000082074 | 0.016116 | 0.42568  |
| SAT1     | ENSG00000130066 | 0.000305 | 0.41429  |
| H3-3A    | ENSG00000163041 | 1.84E-05 | 0.413701 |
| HLA-C    | ENSG00000204525 | 0.005053 | 0.383766 |
| TYMP     | ENSG00000025708 | 0.040287 | 0.344572 |
| CST3     | ENSG00000101439 | 0.017595 | 0.284987 |

---

**Table 3.2:** Down regulated genes in MDSCs WM vs NBM

| Gene     | Ensembl ID      | p_val_adj | avg_log2FC |
|----------|-----------------|-----------|------------|
| MTRNR2L8 | ENSG00000255823 | 1.23E-39  | -3.44267   |
| APOC1    | ENSG00000130208 | 1.3E-24   | -1.95796   |
| MPO      | ENSG00000005381 | 1.1E-13   | -1.80464   |
| GPNMB    | ENSG00000136235 | 6.46E-17  | -1.56256   |
| RETN     | ENSG00000104918 | 8.37E-29  | -1.49135   |
| LGALS3   | ENSG00000131981 | 8.92E-09  | -1.46942   |
| PLAC8    | ENSG00000145287 | 7.66E-25  | -1.3988    |
| CSTB     | ENSG00000160213 | 4.97E-08  | -1.39285   |
| ACP5     | ENSG00000102575 | 9.82E-11  | -1.35105   |
| CTSD     | ENSG00000117984 | 1.22E-24  | -1.30875   |
| FABP5    | ENSG00000164687 | 2.19E-11  | -1.19354   |
| SNHG29   | ENSG00000175061 | 0.006379  | -1.18337   |
| RPS26    | ENSG00000197728 | 5.04E-20  | -1.06164   |
| CD52     | ENSG00000169442 | 1.32E-15  | -1.01213   |
| S100A8   | ENSG00000143546 | 0.000576  | -1.01105   |
| DEFA3    | ENSG00000239839 | 7.56E-18  | -0.98401   |
| CRIP1    | ENSG00000213145 | 4.24E-06  | -0.97074   |
| VAT1     | ENSG00000108828 | 3.15E-12  | -0.90705   |
| ALOX5AP  | ENSG00000132965 | 7.13E-11  | -0.89833   |
| MGLL     | ENSG00000074416 | 1.32E-06  | -0.88633   |
| MCEMP1   | ENSG00000183019 | 1.44E-30  | -0.87966   |
| RPLP1    | ENSG00000137818 | 4.44E-24  | -0.86868   |
| FBP1     | ENSG00000165140 | 4.48E-09  | -0.86796   |
| CAPG     | ENSG00000042493 | 2.62E-13  | -0.83008   |
| AZU1     | ENSG00000172232 | 1.16E-07  | -0.82813   |
| S100A10  | ENSG00000197747 | 2.81E-14  | -0.81387   |
| CES1     | ENSG00000198848 | 9.39E-23  | -0.81031   |
| MGST3    | ENSG00000143198 | 5.27E-09  | -0.80854   |
| OTOA     | ENSG00000155719 | 2.01E-07  | -0.79875   |
| HSPB1    | ENSG00000106211 | 3.71E-07  | -0.79869   |
| TXN      | ENSG00000136810 | 4.59E-10  | -0.78988   |
| CD9      | ENSG00000010278 | 0.004388  | -0.73096   |
| ND6      | ENSG00000198695 | 2.05E-05  | -0.717     |
| STMN1    | ENSG00000117632 | 0.028976  | -0.71401   |
| NFE2     | ENSG00000123405 | 7.37E-15  | -0.69045   |
| NDUFB9   | ENSG00000147684 | 1.01E-05  | -0.68969   |
| MGST1    | ENSG00000008394 | 1.72E-08  | -0.6885    |
| RPLP0    | ENSG00000089157 | 1.32E-07  | -0.68697   |
| CLEC11A  | ENSG00000105472 | 2.37E-06  | -0.68554   |
| VIM      | ENSG00000026025 | 3.5E-16   | -0.67883   |
| NME2     | ENSG00000243678 | 3.11E-06  | -0.64993   |

---

|         |                 |          |          |
|---------|-----------------|----------|----------|
| RPL37A  | ENSG00000197756 | 5.22E-08 | -0.62957 |
| RPSA    | ENSG00000168028 | 0.008162 | -0.62693 |
| FLNA    | ENSG00000196924 | 0.000705 | -0.62115 |
| RNASE2  | ENSG00000169385 | 0.000187 | -0.61684 |
| TSPO    | ENSG00000100300 | 1.32E-06 | -0.61163 |
| RPS29   | ENSG00000213741 | 9.48E-08 | -0.60694 |
| ANXA6   | ENSG00000197043 | 0.001707 | -0.57181 |
| RIPOR2  | ENSG00000111913 | 9.16E-07 | -0.56751 |
| ID2     | ENSG00000115738 | 0.002095 | -0.56036 |
| NLRP12  | ENSG00000142405 | 0.02546  | -0.55588 |
| PPT1    | ENSG00000131238 | 6.2E-06  | -0.55246 |
| RUNX1   | ENSG00000159216 | 0.014902 | -0.54294 |
| DBI     | ENSG00000155368 | 0.000205 | -0.53944 |
| OLR1    | ENSG00000173391 | 1.01E-12 | -0.53487 |
| SPN     | ENSG00000197471 | 1.91E-11 | -0.53352 |
| ND5     | ENSG00000198786 | 0.004563 | -0.53282 |
| RPS12   | ENSG00000112306 | 9.19E-08 | -0.53277 |
| RPS8    | ENSG00000142937 | 0.00599  | -0.52792 |
| NDUFB7  | ENSG00000099795 | 0.003309 | -0.52774 |
| CTSA    | ENSG00000064601 | 0.03935  | -0.52236 |
| RPL36A  | ENSG00000241343 | 0.031665 | -0.5137  |
| SMDT1   | ENSG00000183172 | 0.017234 | -0.51181 |
| PPDPF   | ENSG00000125534 | 0.014595 | -0.49092 |
| ATP5ME  | ENSG00000169020 | 0.000859 | -0.48315 |
| ENO1    | ENSG00000074800 | 5.65E-05 | -0.48313 |
| EIF5A   | ENSG00000132507 | 0.006027 | -0.47763 |
| GLO1    | ENSG00000124767 | 4.72E-05 | -0.47103 |
| EMP1    | ENSG00000134531 | 7.57E-09 | -0.47027 |
| RPL39   | ENSG00000198918 | 3.47E-06 | -0.46084 |
| ATP5MC2 | ENSG00000135390 | 0.007415 | -0.4555  |
| FAH     | ENSG00000103876 | 0.040208 | -0.45483 |
| UBE2J1  | ENSG00000198833 | 4.05E-05 | -0.44805 |
| MIF     | ENSG00000240972 | 7.05E-05 | -0.43981 |
| RPL35   | ENSG00000136942 | 0.000222 | -0.427   |
| ATP5MF  | ENSG00000241468 | 0.008334 | -0.42094 |
| S100A4  | ENSG00000196154 | 0.034083 | -0.42004 |
| RPL21   | ENSG00000122026 | 0.008844 | -0.40061 |
| ESYT1   | ENSG00000139641 | 0.004809 | -0.39989 |
| PRDX2   | ENSG00000167815 | 0.032324 | -0.39848 |
| CDK6    | ENSG00000105810 | 3.44E-05 | -0.39211 |
| RPS15   | ENSG00000115268 | 0.036944 | -0.38861 |
| NME1    | ENSG00000239672 | 0.018121 | -0.3846  |
| COX8A   | ENSG00000176340 | 0.013925 | -0.38446 |
| MYADM   | ENSG00000179820 | 0.008642 | -0.37113 |

---

---

|        |                 |          |          |
|--------|-----------------|----------|----------|
| RPS28  | ENSG00000233927 | 4.59E-05 | -0.34378 |
| ND4L   | ENSG00000212907 | 0.001426 | -0.31732 |
| G6PC3  | ENSG00000141349 | 0.005344 | -0.31626 |
| PDLIM7 | ENSG00000196923 | 0.010798 | -0.30581 |
| RPL41  | ENSG00000229117 | 0.002354 | -0.27351 |
| TMSB10 | ENSG00000034510 | 0.001404 | -0.27337 |
| GGCT   | ENSG00000006625 | 0.038001 | -0.2709  |
| MGST2  | ENSG00000085871 | 0.018239 | -0.26841 |

---

**Table 3.3:** Up regulated genes in CD66b<sup>+</sup> PMN-MDSCs (PMN vs M-MDSCs)

| Gene     | Ensembl ID      | p_val_adj | avg_log2FC |
|----------|-----------------|-----------|------------|
| CLC      | ENSG00000105205 | 4.19E-36  | 5.756697   |
| HDC      | ENSG00000140287 | 9.52E-43  | 3.326741   |
| MPO      | ENSG00000005381 | 3.79E-16  | 3.250901   |
| H4C3     | ENSG00000197061 | 0.000275  | 2.765475   |
| GATA2    | ENSG00000179348 | 2.38E-74  | 2.577398   |
| TPSAB1   | ENSG00000172236 | 1.5E-23   | 2.542903   |
| SNHG29   | ENSG00000175061 | 3.71E-10  | 2.267067   |
| MS4A2    | ENSG00000149534 | 3.39E-34  | 2.227676   |
| CENPF    | ENSG00000117724 | 4.22E-74  | 2.101197   |
| STMN1    | ENSG00000117632 | 3.59E-34  | 2.036355   |
| MKI67    | ENSG00000148773 | 1.5E-72   | 2.019794   |
| PRG2     | ENSG00000186652 | 9.18E-12  | 1.996044   |
| PRTN3    | ENSG00000196415 | 2.28E-12  | 1.985173   |
| CPA3     | ENSG00000163751 | 1.32E-45  | 1.862147   |
| HMGB2    | ENSG00000164104 | 5.65E-16  | 1.73148    |
| CXCR4    | ENSG00000121966 | 9.69E-06  | 1.692182   |
| UBE2C    | ENSG00000175063 | 1.99E-68  | 1.677887   |
| CRIP1    | ENSG00000213145 | 1.08E-07  | 1.660485   |
| H1-5     | ENSG00000184357 | 4.88E-27  | 1.545581   |
| MS4A3    | ENSG00000149516 | 1.19E-28  | 1.542827   |
| AKAP12   | ENSG00000131016 | 2.37E-31  | 1.538941   |
| AZU1     | ENSG00000172232 | 6.58E-09  | 1.523372   |
| TPX2     | ENSG00000088325 | 8.39E-72  | 1.519861   |
| LTC4S    | ENSG00000213316 | 2.24E-05  | 1.512848   |
| IFITM2   | ENSG00000185201 | 6.95E-06  | 1.508186   |
| LDHB     | ENSG00000111716 | 3.28E-11  | 1.474235   |
| ASPM     | ENSG00000066279 | 5.28E-51  | 1.45825    |
| ALOX5AP  | ENSG00000132965 | 0.012616  | 1.384832   |
| TOP2A    | ENSG00000131747 | 2.8E-47   | 1.37243    |
| SLC40A1  | ENSG00000138449 | 1.35E-32  | 1.369034   |
| SERPINB1 | ENSG00000021355 | 5.11E-06  | 1.362723   |
| RPSA     | ENSG00000168028 | 9.29E-07  | 1.325197   |
| GIHCG    | ENSG00000257698 | 4.39E-34  | 1.316974   |
| TUBB     | ENSG00000196230 | 5.44E-05  | 1.291691   |
| SPN      | ENSG00000197471 | 1.55E-29  | 1.27796    |
| NUSAP1   | ENSG00000137804 | 7.07E-40  | 1.266724   |
| NFE2     | ENSG00000123405 | 6.67E-29  | 1.259665   |
| PRSS57   | ENSG00000185198 | 1.28E-46  | 1.258901   |
| RPS3     | ENSG00000149273 | 3.13E-07  | 1.25151    |

---

|         |                 |          |          |
|---------|-----------------|----------|----------|
| SELL    | ENSG00000188404 | 2.99E-25 | 1.227638 |
| RFLNB   | ENSG00000183688 | 0.000276 | 1.207233 |
| RPS4X   | ENSG00000198034 | 0.000356 | 1.204779 |
| RPS8    | ENSG00000142937 | 4.32E-08 | 1.203107 |
| CKAP2   | ENSG00000136108 | 3.4E-13  | 1.199451 |
| GAS5    | ENSG00000234741 | 0.001427 | 1.195993 |
| EEF1B2  | ENSG00000114942 | 0.005109 | 1.183574 |
| RPS3A   | ENSG00000145425 | 0.002069 | 1.182941 |
| RPS6    | ENSG00000137154 | 3.67E-06 | 1.172018 |
| RPLP0   | ENSG00000089157 | 0.000577 | 1.159798 |
| RNASE2  | ENSG00000169385 | 0.004754 | 1.159035 |
| ELANE   | ENSG00000197561 | 9.17E-09 | 1.158835 |
| RPL37A  | ENSG00000197756 | 5.47E-10 | 1.150954 |
| RUNX1   | ENSG00000159216 | 2.89E-06 | 1.145739 |
| CLEC11A | ENSG00000105472 | 2.29E-10 | 1.12436  |
| FCER1A  | ENSG00000179639 | 4.22E-06 | 1.124212 |
| ANP32B  | ENSG00000136938 | 6.8E-11  | 1.122616 |
| SOX4    | ENSG00000124766 | 2.54E-23 | 1.121986 |
| RPS18   | ENSG00000231500 | 0.00956  | 1.113762 |
| RPLP1   | ENSG00000137818 | 6.51E-12 | 1.107038 |
| PTTG1   | ENSG00000164611 | 3.56E-32 | 1.091325 |
| CENPE   | ENSG00000138778 | 4.65E-29 | 1.086167 |
| RPS21   | ENSG00000171858 | 3.26E-10 | 1.075463 |
| LMNB1   | ENSG00000113368 | 2.12E-21 | 1.075261 |
| HMGN1   | ENSG00000205581 | 6.44E-09 | 1.074972 |
| HMGB1   | ENSG00000189403 | 3.62E-05 | 1.074509 |
| SMC4    | ENSG00000113810 | 1.96E-13 | 1.074066 |
| RPL7A   | ENSG00000148303 | 0.000105 | 1.069674 |
| TRIM58  | ENSG00000162722 | 1.6E-06  | 1.069102 |
| NUCB2   | ENSG00000070081 | 3.12E-16 | 1.067425 |
| NKG7    | ENSG00000105374 | 2.21E-10 | 1.067268 |
| RPL11   | ENSG00000142676 | 9.76E-09 | 1.060704 |
| CLU     | ENSG00000120885 | 3.76E-10 | 1.059901 |
| EEF1G   | ENSG00000254772 | 1.43E-06 | 1.055702 |
| EXD3    | ENSG00000187609 | 2.2E-06  | 1.048157 |
| RRM2    | ENSG00000171848 | 9.52E-43 | 1.040142 |
| ATP2A3  | ENSG00000074370 | 6.9E-06  | 1.035064 |
| RPL36A  | ENSG00000241343 | 0.004709 | 1.028556 |
| PCLAF   | ENSG00000166803 | 4.47E-49 | 1.02729  |
| PLAC8   | ENSG00000145287 | 1.59E-11 | 1.025141 |
| HSH2D   | ENSG00000196684 | 5.2E-28  | 1.018508 |
| RIPOR2  | ENSG00000111913 | 8.35E-15 | 1.016339 |
| ZFAS1   | ENSG00000177410 | 0.000422 | 1.011066 |
| RPS12   | ENSG00000112306 | 7.54E-07 | 1.004999 |

---



---

|          |                 |          |          |
|----------|-----------------|----------|----------|
| CENPU    | ENSG00000151725 | 3.85E-28 | 0.997454 |
| IL2RG    | ENSG00000147168 | 4.2E-07  | 0.995029 |
| TMPO     | ENSG00000120802 | 1.94E-05 | 0.991066 |
| CDK6     | ENSG00000105810 | 4.41E-19 | 0.990045 |
| TAGLN2   | ENSG00000158710 | 0.000221 | 0.986615 |
| HMMR     | ENSG00000072571 | 1.93E-32 | 0.985105 |
| PRDX2    | ENSG00000167815 | 1.28E-09 | 0.980119 |
| PDCD4    | ENSG00000150593 | 1.57E-08 | 0.978999 |
| SNHG6    | ENSG00000245910 | 9.03E-07 | 0.977412 |
| RPL34    | ENSG00000109475 | 1.33E-07 | 0.968888 |
| CTSG     | ENSG00000100448 | 1.64E-19 | 0.957833 |
| RPS23    | ENSG00000186468 | 0.002024 | 0.957315 |
| RPL39    | ENSG00000198918 | 1.89E-08 | 0.95377  |
| FAM111A  | ENSG00000166801 | 1.51E-12 | 0.952204 |
| ATAD2    | ENSG00000156802 | 1.38E-22 | 0.951895 |
| HNRNPA1  | ENSG00000135486 | 0.03073  | 0.94969  |
| RPL7     | ENSG00000147604 | 0.000525 | 0.938803 |
| KNL1     | ENSG00000137812 | 9.66E-37 | 0.935684 |
| RPL32    | ENSG00000144713 | 5.14E-06 | 0.934567 |
| RPS7     | ENSG00000171863 | 0.00185  | 0.928646 |
| GMCL1    | ENSG00000087338 | 0.0001   | 0.926037 |
| RPL37    | ENSG00000145592 | 1.4E-05  | 0.922913 |
| RPS24    | ENSG00000138326 | 1.05E-08 | 0.919488 |
| RCSD1    | ENSG00000198771 | 0.00143  | 0.919077 |
| RBBP7    | ENSG00000102054 | 1.14E-05 | 0.918369 |
| ITM2C    | ENSG00000135916 | 2.12E-37 | 0.916147 |
| MIS18BP1 | ENSG00000129534 | 9.94E-10 | 0.905717 |
| BIRC5    | ENSG00000089685 | 1.14E-45 | 0.903938 |
| GYPC     | ENSG00000136732 | 1.98E-15 | 0.894927 |
| RPS14    | ENSG00000164587 | 3.79E-07 | 0.894475 |
| PLP2     | ENSG00000102007 | 0.000144 | 0.893397 |
| DUT      | ENSG00000128951 | 1.14E-12 | 0.892134 |
| FRY      | ENSG00000073910 | 6.1E-09  | 0.89084  |
| RPL9     | ENSG00000163682 | 0.012265 | 0.885919 |
| SMC2     | ENSG00000136824 | 2.12E-18 | 0.882759 |
| RAB37    | ENSG00000172794 | 4.52E-23 | 0.878286 |
| ANKRD36  | ENSG00000135976 | 9.32E-29 | 0.875948 |
| C21orf58 | ENSG00000160298 | 2.96E-25 | 0.874837 |
| CKS1B    | ENSG00000173207 | 9.11E-22 | 0.868548 |
| GTSE1    | ENSG00000075218 | 2.49E-37 | 0.868004 |
| AURKB    | ENSG00000178999 | 1.03E-29 | 0.867592 |
| P2RY8    | ENSG00000182162 | 0.000421 | 0.866191 |
| TROAP    | ENSG00000135451 | 2.25E-18 | 0.858434 |
| CLSPN    | ENSG00000092853 | 3.57E-28 | 0.85122  |

---

---

|                 |                 |          |          |
|-----------------|-----------------|----------|----------|
| H3C2            | ENSG00000286522 | 3.96E-34 | 0.850851 |
| CST7            | ENSG00000077984 | 6.31E-11 | 0.844655 |
| EIF3E           | ENSG00000104408 | 0.000477 | 0.837683 |
| HELLS           | ENSG00000119969 | 1.48E-19 | 0.832313 |
| RPL35A          | ENSG00000182899 | 0.003942 | 0.821691 |
| RPS29           | ENSG00000213741 | 0.000984 | 0.816206 |
| RPL18           | ENSG00000063177 | 0.001696 | 0.811357 |
| ATP6V0A2        | ENSG00000185344 | 1.76E-11 | 0.809117 |
| SGO1            | ENSG00000129810 | 6.31E-37 | 0.807425 |
| NCAPD2          | ENSG00000010292 | 3.2E-12  | 0.80421  |
| C12orf57        | ENSG00000111678 | 5.14E-07 | 0.803628 |
| NASP            | ENSG00000132780 | 0.040245 | 0.797862 |
| RPS15           | ENSG00000115268 | 2.78E-05 | 0.796079 |
| TYMS            | ENSG00000176890 | 3.2E-48  | 0.784137 |
| PRC1            | ENSG00000198901 | 8.58E-23 | 0.781677 |
| SPTBN1          | ENSG00000115306 | 2.67E-26 | 0.780825 |
| MED13L          | ENSG00000123066 | 0.032125 | 0.778536 |
| GPSM2           | ENSG00000121957 | 3.36E-15 | 0.774331 |
| RAD21           | ENSG00000164754 | 0.00324  | 0.772898 |
| CHST12          | ENSG00000136213 | 9.43E-23 | 0.768095 |
| RPL21           | ENSG00000122026 | 0.010429 | 0.766095 |
| RPL19           | ENSG00000108298 | 0.005349 | 0.764426 |
| DCK             | ENSG00000156136 | 0.001647 | 0.763699 |
| HJURP           | ENSG00000123485 | 8.29E-26 | 0.752284 |
| MIR4435-<br>2HG | ENSG00000172965 | 0.018826 | 0.747043 |
| CAMLG           | ENSG00000164615 | 1.32E-06 | 0.742797 |
| ITM2A           | ENSG00000078596 | 4.82E-28 | 0.742386 |
| MCM7            | ENSG00000166508 | 2.68E-07 | 0.736668 |
| ARHGAP11A       | ENSG00000198826 | 1.49E-20 | 0.733165 |
| MYB             | ENSG00000118513 | 2.2E-43  | 0.729372 |
| CDK1            | ENSG00000170312 | 1.26E-29 | 0.727351 |
| RPS13           | ENSG00000110700 | 0.016494 | 0.721787 |
| RPL24           | ENSG00000114391 | 0.011459 | 0.717553 |
| MAN1A1          | ENSG00000111885 | 1.66E-05 | 0.708313 |
| SHCBP1          | ENSG00000171241 | 1.56E-23 | 0.705621 |
| SH2D3C          | ENSG00000095370 | 0.001338 | 0.705182 |
| FANCI           | ENSG00000140525 | 1.74E-19 | 0.699176 |
| STX17           | ENSG00000136874 | 7.72E-06 | 0.694126 |
| SMIM24          | ENSG00000095932 | 7E-37    | 0.693943 |
| NCAPG           | ENSG00000109805 | 5.41E-34 | 0.690883 |
| CCND2           | ENSG00000118971 | 1.39E-28 | 0.686785 |
| PRKACB          | ENSG00000142875 | 3.22E-10 | 0.686408 |
| MZT2B           | ENSG00000152082 | 3.35E-09 | 0.681131 |

---

---

|                |                 |          |          |
|----------------|-----------------|----------|----------|
| RPL22          | ENSG00000116251 | 0.007578 | 0.680371 |
| KIT            | ENSG00000157404 | 1.06E-34 | 0.679595 |
| ASF1B          | ENSG00000105011 | 1.33E-16 | 0.67663  |
| THUMP3-<br>AS1 | ENSG00000206573 | 0.035468 | 0.668871 |
| ANKRD28        | ENSG00000206560 | 5.82E-21 | 0.668227 |
| DTYMK          | ENSG00000168393 | 0.000121 | 0.666463 |
| PLAAT4         | ENSG00000133321 | 0.005118 | 0.662976 |
| PLK1           | ENSG00000166851 | 5.72E-15 | 0.658337 |
| TFDP2          | ENSG00000114126 | 8.87E-18 | 0.658074 |
| SNHG8          | ENSG00000269893 | 0.000329 | 0.657945 |
| SPAG5          | ENSG00000076382 | 2.09E-14 | 0.654944 |
| DHFR           | ENSG00000228716 | 7.02E-07 | 0.653891 |
| CDKN3          | ENSG00000100526 | 3.82E-33 | 0.652731 |
| MT2A           | ENSG00000125148 | 0.000243 | 0.649368 |
| TSTD1          | ENSG00000215845 | 4.49E-07 | 0.649195 |
| ACAP1          | ENSG00000072818 | 7.41E-05 | 0.648597 |
| SEPTIN1        | ENSG00000180096 | 0.001204 | 0.647772 |
| DLGAP5         | ENSG00000126787 | 1.43E-28 | 0.638548 |
| SLC39A3        | ENSG00000141873 | 8.39E-07 | 0.637574 |
| CD59           | ENSG00000085063 | 7.91E-07 | 0.637421 |
| RPL36          | ENSG00000130255 | 0.037523 | 0.637154 |
| CCNG1          | ENSG00000113328 | 5.83E-09 | 0.636174 |
| HSD17B11       | ENSG00000198189 | 0.000278 | 0.633212 |
| FOXM1          | ENSG00000111206 | 2.12E-22 | 0.629363 |
| GSE1           | ENSG00000131149 | 0.000621 | 0.627331 |
| TK1            | ENSG00000167900 | 5.65E-27 | 0.62104  |
| CTSW           | ENSG00000172543 | 3E-24    | 0.617351 |
| VRK1           | ENSG00000100749 | 1.89E-13 | 0.608877 |
| SGO2           | ENSG00000163535 | 1.68E-08 | 0.608796 |
| CKS2           | ENSG00000123975 | 1.33E-15 | 0.608781 |
| ANLN           | ENSG00000011426 | 9.89E-26 | 0.607724 |
| CENPM          | ENSG00000100162 | 1.48E-29 | 0.601955 |
| HOXA9          | ENSG00000078399 | 1.24E-21 | 0.598224 |
| BRCA1          | ENSG00000012048 | 1.03E-08 | 0.596961 |
| FEN1           | ENSG00000168496 | 2.05E-12 | 0.596137 |
| H2AC6          | ENSG00000180573 | 1.76E-07 | 0.595779 |
| H2AX           | ENSG00000188486 | 3.79E-11 | 0.586112 |
| VPS13A         | ENSG00000197969 | 1.35E-06 | 0.584654 |
| UBE2S          | ENSG00000108106 | 0.038159 | 0.584524 |
| UBAP2          | ENSG00000137073 | 8.19E-07 | 0.579605 |
| TMED3          | ENSG00000166557 | 1.6E-06  | 0.577136 |
| CEP43          | ENSG00000213066 | 1.28E-05 | 0.575753 |
| ZNF521         | ENSG00000198795 | 2.37E-31 | 0.574482 |

---

---

|          |                  |          |          |
|----------|------------------|----------|----------|
| TACC3    | ENSG00000013810  | 0.000356 | 0.572821 |
| PTMA     | ENSG000000187514 | 0.00349  | 0.567363 |
| EZH2     | ENSG000000106462 | 4.37E-13 | 0.564042 |
| RAB44    | ENSG000000255587 | 5.51E-23 | 0.563885 |
| H1-2     | ENSG000000187837 | 0.000979 | 0.555258 |
| RFC3     | ENSG000000133119 | 2.47E-06 | 0.553525 |
| SEPTIN6  | ENSG000000125354 | 0.023877 | 0.55333  |
| INCENP   | ENSG000000149503 | 3.35E-05 | 0.548239 |
| SF3A2    | ENSG000000104897 | 0.006724 | 0.546151 |
| ST8SIA6  | ENSG000000148488 | 2.23E-28 | 0.54447  |
| BZW2     | ENSG000000136261 | 7.34E-09 | 0.543215 |
| SMARCAD1 | ENSG000000163104 | 0.00185  | 0.541527 |
| NSD2     | ENSG000000109685 | 0.00283  | 0.541024 |
| CKAP5    | ENSG000000175216 | 3.24E-05 | 0.53826  |
| HAUS4    | ENSG000000092036 | 3.13E-06 | 0.537146 |
| SVIP     | ENSG000000198168 | 3.27E-07 | 0.5354   |
| IGFBP7   | ENSG000000163453 | 1.18E-13 | 0.535156 |
| KDM5B    | ENSG000000117139 | 6.38E-08 | 0.533693 |
| ANP32E   | ENSG000000143401 | 9.81E-05 | 0.529266 |
| BRCA2    | ENSG000000139618 | 1.37E-06 | 0.528292 |
| MPHOSPH9 | ENSG000000051825 | 2.33E-09 | 0.528044 |
| IMPDH2   | ENSG000000178035 | 2.46E-05 | 0.526636 |
| SMIM3    | ENSG000000256235 | 1.52E-07 | 0.523294 |
| ELOVL5   | ENSG000000012660 | 8.09E-05 | 0.523166 |
| TESPA1   | ENSG000000135426 | 7.82E-32 | 0.521738 |
| CCNA2    | ENSG000000145386 | 1.17E-21 | 0.51973  |
| DYNC2I2  | ENSG000000119333 | 4.33E-17 | 0.517127 |
| CDC20    | ENSG000000117399 | 9.13E-26 | 0.515282 |
| LMAN1    | ENSG000000074695 | 2.97E-11 | 0.515272 |
| NOB1     | ENSG000000141101 | 0.000192 | 0.515168 |
| PXMP2    | ENSG000000176894 | 6.98E-21 | 0.513947 |
| DANCR    | ENSG000000226950 | 4.43E-05 | 0.512483 |
| CENPJ    | ENSG000000151849 | 5.33E-10 | 0.5061   |
| HMGB3    | ENSG00000029993  | 0.000654 | 0.503048 |
| C18orf21 | ENSG000000141428 | 0.000482 | 0.501534 |
| UHRF1    | ENSG000000276043 | 9.8E-16  | 0.501521 |

---

**Table 3.4:** Down regulated genes in CD66b<sup>+</sup> MDSCs (PMN vs M-MDSCs)

| <b>A</b> | <b>Ensemble ID</b> | <b>p value</b> | <b>Avg log2FC</b> |
|----------|--------------------|----------------|-------------------|
| CCL2     | ENSG00000108691    | 1.36E-09       | -2.62118          |
| FUCA1    | ENSG00000179163    | 2.82E-14       | -2.3794           |
| THBS1    | ENSG00000137801    | 2.27E-14       | -2.33764          |
| TGFBI    | ENSG00000120708    | 9.37E-17       | -2.21271          |
| RNASE1   | ENSG00000129538    | 8.13E-12       | -2.12461          |
| MAFB     | ENSG00000204103    | 3.62E-13       | -2.01481          |
| STAB1    | ENSG00000010327    | 1.32E-17       | -1.98376          |
| FOS      | ENSG00000170345    | 8.76E-13       | -1.9661           |
| ZFP36L1  | ENSG00000185650    | 5.48E-21       | -1.9505           |
| MS4A7    | ENSG00000166927    | 5.59E-11       | -1.87395          |
| FTL      | ENSG00000087086    | 1.37E-29       | -1.81939          |
| DAB2     | ENSG00000153071    | 6.14E-08       | -1.79421          |
| CTSB     | ENSG00000164733    | 9.5E-14        | -1.7772           |
| CD163    | ENSG00000177575    | 3.59E-09       | -1.74188          |
| ADAP2    | ENSG00000184060    | 3E-08          | -1.56232          |
| TYROBP   | ENSG00000011600    | 9.88E-28       | -1.56012          |
| FPR3     | ENSG00000187474    | 9.14E-06       | -1.54023          |
| MARCKS   | ENSG00000277443    | 1.6E-09        | -1.53764          |
| AIF1     | ENSG00000204472    | 1.98E-20       | -1.53677          |
| FTH1     | ENSG00000167996    | 2.23E-20       | -1.53566          |
| SLC43A2  | ENSG00000167703    | 1.52E-05       | -1.50193          |
| IER3     | ENSG00000137331    | 2.26E-05       | -1.50159          |
| CYBB     | ENSG00000165168    | 8.07E-14       | -1.48151          |
| FCGR3A   | ENSG00000203747    | 4.92E-06       | -1.4484           |
| FCGRT    | ENSG00000104870    | 1.06E-07       | -1.43981          |
| LPAR6    | ENSG00000139679    | 2.08E-06       | -1.42549          |
| ENG      | ENSG00000106991    | 0.000127       | -1.4219           |
| IFI30    | ENSG00000216490    | 1.31E-27       | -1.40668          |
| TIMP1    | ENSG00000102265    | 2.73E-08       | -1.34886          |
| RGL1     | ENSG00000143344    | 0.000939       | -1.33619          |
| CD68     | ENSG00000129226    | 6.55E-08       | -1.29953          |
| CSF1R    | ENSG00000182578    | 7.24E-06       | -1.29454          |
| HIF1A    | ENSG00000100644    | 6.81E-05       | -1.28243          |
| CAPZB    | ENSG00000077549    | 1.35E-05       | -1.27234          |
| SEMA6B   | ENSG00000167680    | 0.004961       | -1.27174          |
| SAMHD1   | ENSG00000101347    | 3.77E-11       | -1.27114          |
| FCER1G   | ENSG00000158869    | 1.74E-14       | -1.27048          |
| CD14     | ENSG00000170458    | 6.19E-11       | -1.26419          |
| NCF4     | ENSG00000100365    | 0.000185       | -1.26166          |

---

|          |                 |          |          |
|----------|-----------------|----------|----------|
| NPC2     | ENSG00000119655 | 1.31E-09 | -1.25226 |
| PSAP     | ENSG00000197746 | 9.79E-15 | -1.25053 |
| LILRB2   | ENSG00000131042 | 1.6E-06  | -1.24528 |
| TNFRSF1B | ENSG00000028137 | 0.000252 | -1.23106 |
| MPEG1    | ENSG00000197629 | 1.22E-05 | -1.20637 |
| HMOX1    | ENSG00000100292 | 0.003776 | -1.19877 |
| CYP1B1   | ENSG00000138061 | 0.000492 | -1.18747 |
| HCK      | ENSG00000101336 | 0.001831 | -1.17443 |
| FCGR2A   | ENSG00000143226 | 0.000685 | -1.16347 |
| COTL1    | ENSG00000103187 | 1.76E-08 | -1.16176 |
| DUSP6    | ENSG00000139318 | 1.34E-05 | -1.14718 |
| MAF      | ENSG00000178573 | 0.004863 | -1.14707 |
| RCBTB2   | ENSG00000136161 | 0.008594 | -1.11183 |
| EPB41L3  | ENSG00000082397 | 0.009476 | -1.10973 |
| HCLS1    | ENSG00000180353 | 0.00014  | -1.1097  |
| ANXA5    | ENSG00000164111 | 1.37E-09 | -1.10963 |
| SNX6     | ENSG00000129515 | 0.020675 | -1.1002  |
| SAT1     | ENSG00000130066 | 1.23E-06 | -1.0967  |
| LRP1     | ENSG00000123384 | 2.18E-06 | -1.09641 |
| S100A11  | ENSG00000163191 | 2.67E-13 | -1.07652 |
| SH3BGRL3 | ENSG00000142669 | 1.64E-16 | -1.06405 |
| GAS7     | ENSG00000007237 | 0.000356 | -1.04555 |
| LILRB3   | ENSG00000204577 | 0.023717 | -1.00813 |
| PLEC     | ENSG00000178209 | 0.000279 | -1.00635 |
| GRB2     | ENSG00000177885 | 0.000119 | -1.00574 |
| C5AR1    | ENSG00000197405 | 0.003505 | -1.00418 |
| POLR2L   | ENSG00000177700 | 0.000414 | -0.99999 |
| CAMK1    | ENSG00000134072 | 0.005328 | -0.99805 |
| TYMP     | ENSG00000025708 | 4.57E-07 | -0.98869 |
| CTSD     | ENSG00000117984 | 0.023894 | -0.98465 |
| LILRB1   | ENSG00000104972 | 0.012184 | -0.98254 |
| NPL      | ENSG00000135838 | 0.036256 | -0.96893 |
| DOK2     | ENSG00000147443 | 0.003335 | -0.96587 |
| ANPEP    | ENSG00000166825 | 0.01782  | -0.96533 |
| IL10RA   | ENSG00000110324 | 0.004965 | -0.95826 |
| ZEB2     | ENSG00000169554 | 0.024935 | -0.94658 |
| KCTD12   | ENSG00000178695 | 0.000712 | -0.9456  |
| RAB31    | ENSG00000168461 | 0.012298 | -0.92868 |
| TCIRG1   | ENSG00000110719 | 0.017689 | -0.92112 |
| CTSS     | ENSG00000163131 | 4.83E-06 | -0.89963 |
| C1orf162 | ENSG00000143110 | 0.004638 | -0.87958 |
| AP2S1    | ENSG00000042753 | 0.03625  | -0.86919 |
| CTSZ     | ENSG00000101160 | 0.013842 | -0.86219 |
| PELATON  | ENSG00000224397 | 0.042894 | -0.85707 |

---

---

|         |                 |          |          |
|---------|-----------------|----------|----------|
| CST3    | ENSG00000101439 | 1.5E-08  | -0.85604 |
| ARRB2   | ENSG00000141480 | 0.032251 | -0.83533 |
| PTPRE   | ENSG00000132334 | 0.002659 | -0.81979 |
| PKM     | ENSG00000067225 | 0.000481 | -0.78819 |
| ARPC3   | ENSG00000111229 | 0.00094  | -0.7651  |
| CALM1   | ENSG00000198668 | 0.032292 | -0.74665 |
| LST1    | ENSG00000204482 | 0.000312 | -0.74503 |
| ATP5F1E | ENSG00000124172 | 1.69E-08 | -0.73191 |
| SERF2   | ENSG00000140264 | 1.11E-08 | -0.68716 |
| S100A4  | ENSG00000196154 | 2.01E-05 | -0.66725 |
| FCN1    | ENSG00000085265 | 0.004913 | -0.65635 |
| PFN1    | ENSG00000108518 | 0.000238 | -0.6291  |
| PFDN5   | ENSG00000123349 | 0.012659 | -0.57916 |
| CFL1    | ENSG00000172757 | 0.026594 | -0.57184 |
| S100A6  | ENSG00000197956 | 0.000249 | -0.5583  |
| ANXA2   | ENSG00000182718 | 0.030668 | -0.55689 |
| LAPTM5  | ENSG00000162511 | 0.017644 | -0.51119 |

---
